# Supplementary material for: Fabrication of Superhydrophobic Porous Brass by Chemical Dealloying for Efficient Emulsion Separation
Source: MDPI journal article supplement (doi:10.3390/molecules28186509), 2023-09-08
Supplement: s1 [file s1]

# Supporting Information

## Fabrication of Superhydrophobic Porous Brass by Chemical Dealloying for Efficient Emulsion Separation

Yanbiao Zhou, Qingqing Ye, Yongjun Han \*, Guoxu He and Changdong Chen \*

School of Chemistry and Environmental Engineering, Pingdingshan University, Pingdingshan 467000, China

\* Correspondence: hyj@pdsu.edu.cn (Y.H.); 2749@pdsu.edu.cn (C.C.)

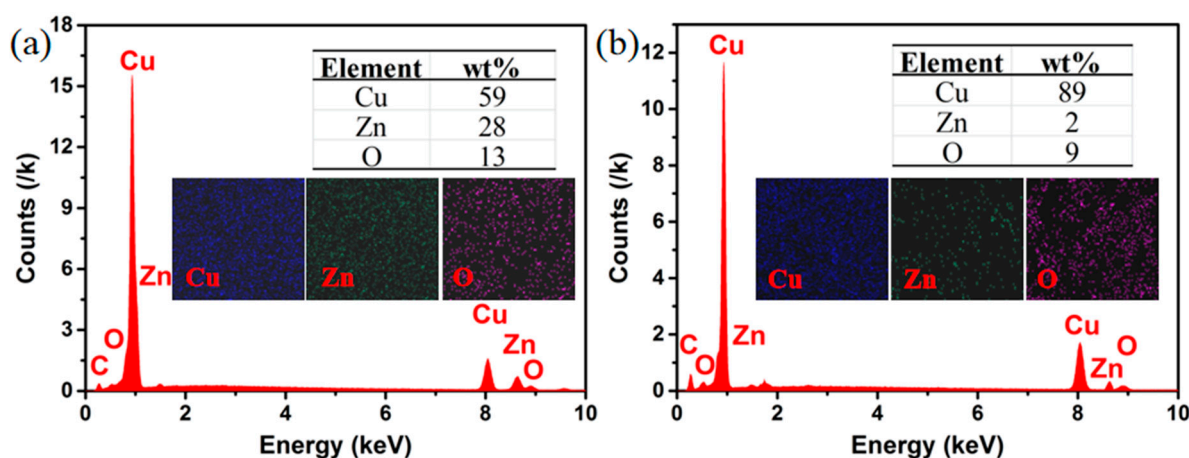

Figure S1. EDS spectra analysis and mapping images: (a) pristine brass and (b) dealloyed brass.

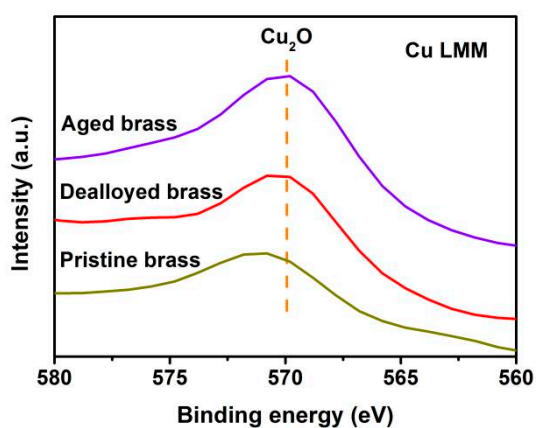

Figure S2. Cu<sub>LMM</sub> Auger transitions of pristine brass, dealloyed brass and aged brass.

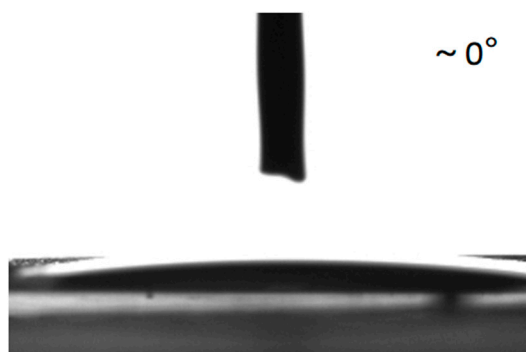

**Figure S3.** The kerosene CA of the aged brass surface in air.

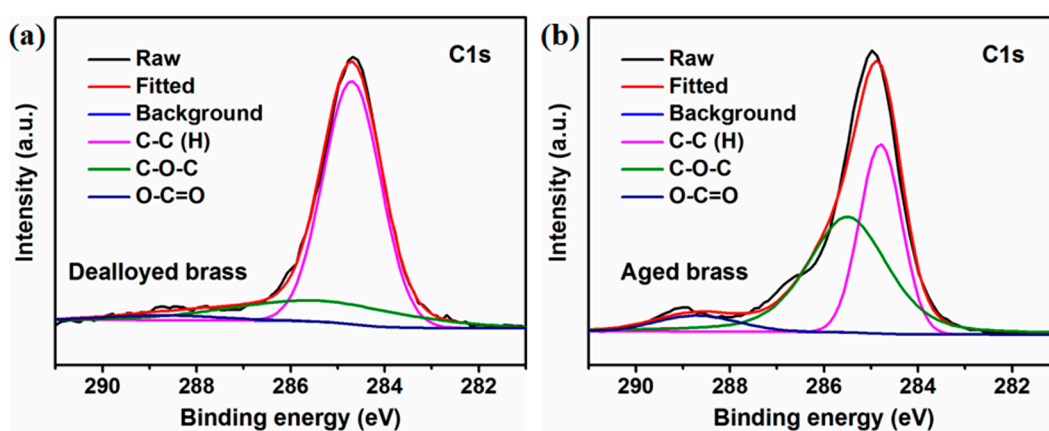

**Figure S4.** High resolution C1s spectra of (a) the dealloyed brass and (b) the aged brass.

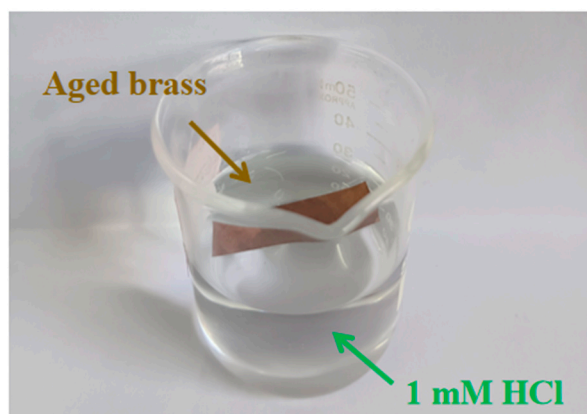

**Figure S5.** The aged brass floated on the liquid surface of 1 mM HCl solution.
